# Supplementary material
Source: publisher site journal article supplement (https://static.cambridge.org/content/id/urn:cambridge.org:id:article:S0047279419000163/resource/name/S0047279419000163supp001.docx)
Supplement: Supplementary file 1 [file S0047279419000163supp001.docx]

**Supplementary Table 1: Example Questions from In-Depth Interview Protocols with Latino Immigrants and Gatekeepers**

| **LATINO IMMIGRANTS** |
| --- |
| **Questions related to immigration and sociopolitical context** |
| - When did you come to the United States? Tell me about your decision to come to the United States. What motivated you to leave your home country? Follow up: Why did you decide to come to New York? Have you been to other countries? |
| - Let’s talk about your journey to the U.S. How did you prepare? Who did you talk to? What steps did you take? |
| - Now that you have been in the U.S. for ___ years, what do you miss? - Where do you call home? What makes you feel at home? (probe) |
| - Do you have plans to stay (in U.S.)? Do you have plans to go back (to home country)? How feasible do you think this plan is? |
| - Do you have families in other countries? (probe) Where have you gone in search for work? |
| - How would you describe an average day for you? In other words, what do you first do when you wake up in the morning? In the afternoon? Before you go to bed? What are your primary responsibilities and activities? (If you had to list you top five?) |
| - There’s a lot of stuff in the news about immigration and problems that immigrants may have. What do you think people think about immigrants in the U.S.? What do you hear about immigrants in the U.S.? |
| - How do immigrants impact jobs in the United States? How do immigrants impact health care in the United States? - Now we are going to talk about U.S. policies. Have you or someone you know ever talked to someone to get more information about immigration/migration? (Probe) - What do you know about the rules and laws about immigration? How have these rules impacted you? Can you talk about the process of getting a driver’s license or identification card? |
| **Questions related to health (social, psycho-emotional, physical, and health access)** |
| - Let’s talk about the resources available in New York City. Are you receiving any form of education here? (probe family members or friends) - What about health services—what health services do you use? - What about social services—Do you receive any social services? How useful have these services/resources been—why? Can you talk about how the resources here are different or similar to those in your home country? |
| - Can you talk about how the resources here are different or similar to those in your home country? - Let’s talk about people who are important do you—how would you describe the people who are important to you in your life? Can you talk about who they are and why they are important to you? What are your interactions with these people on a daily basis? |
| - Let’s talk about health and health services in the U.S. When someone in your family is sick, where do you go? Have you gone to the emergency department before? Why? Have you used a health service or consulted a doctor in the U.S.? (probe) Was the doctor a private doctor? Have you sought any specific information regarding a health concern? Have you talked to a pharmacist about medical concerns? (probe) What about a specific medication |
| - (If participant has children) What health information has your child(ren)’s school given you or your child(ren)? What services (if any) are offered at your child(ren)’s school? |
| - What organizations or social clubs do you belong to? What about church/other agencies/organizations? What types of activities do you participate in outside of the home? (probe) |
| **GATEKEEPERS** |

- How would you describe your professional role within the community? Tell me about your responsibilities to the community. Tell me about the extent of your interaction with community members.
- Can you describe the migratory processes that you think impact Corona? In other words, what have you noticed about the migration patterns to the community? How have they shaped Corona to be the community it is today?
- How would you describe the Mexican immigrant community in Corona? How would you describe the Dominican immigrant community in Corona? What would you say is similar about them? What is different about these groups? Can you talk about the interactions between the Mexican and Dominican community? In other words, would you say their social networks are integrated or separated?
- How do you think immigrants in Corona perceive their migration trajectory to Corona? What do you know about immigrants’ expectations and experiences specific to migrating to Corona?
- What would you say are the main challenges of the Corona community?
- If you could describe the top three issues people are struggling with in Corona, what would they be? What are the main health concerns of the community?
